# Supplementary material for: Diagnostic Stewardship in Community-Acquired Pneumonia With Syndromic Molecular Testing: A Randomized Clinical Trial
Source: PubMed Central journal article supplement (PMC10918504; doi:10.1001/jamanetworkopen.2024.0830), 2024-03-06
Supplement: jamanetwopen-e240830-s002.pdf [file jamanetwopen-e240830-s002.pdf]

## Supplemental Online Content

Markussen DL, Serigstad S, Ritz C, et al. Diagnostic stewardship in community-acquired pneumonia with syndromic molecular testing: a randomized clinical trial. *JAMA Netw Open*. 2024;7(3):e240830. doi:10.1001/jamanetworkopen.2024.0830

**eTable 1.** Targets included in the BIOFIRE® FILMARRAY® Pneumonia plus Panel

**eTable 2.** Standard Comments for Detected Bacteria

**eTable 3.** Definitions and Diagnostic Clinical Criteria for CAP

**eTable 4.** Baseline Characteristics for CAP Patients Only (n=200)

**eTable 5.** Pathogen-Directed Treatment Within 48 Hours for Patients With Pneumonia (n=200)

**eTable 6.** Comparison of Length of Stay and Clinical Outcomes Between Rapid Testing by FAP Plus and Standard-of-Care for All Randomised Patients (n=374) and CAP Patients only (n=200), Respectively

**eTable 7.** Microbiological Detections in Respiratory Samples in the Standard-of-Care and FAP Plus Arms

This supplemental material has been provided by the authors to give readers additional information about their work.

**e Table 1. Targets included in the BIOFIRE® FILMARRAY® Pneumonia *plus* Panel**

**Bacteria (semi quantitative)**

*Acinetobacter calcoaceticus-baumannii* complex  
*Enterobacter cloacae*  
*Escherichia coli*  
*Haemophilus influenzae*  
*Klebsiella aerogenes*  
*Klebsiella oxytoca*  
*Klebsiella pneumoniae* group  
*Moraxella catarrhalis*  
*Proteus* spp.  
*Pseudomonas aeruginosa*  
*Serratia marcescens*  
*Staphylococcus aureus*  
*Streptococcus agalactiae*  
*Streptococcus pneumoniae*  
*Streptococcus pyogenes*

**Atypical Bacteria (Qualitative)**

*Legionella pneumophila*  
*Mycoplasma pneumoniae*  
*Chlamydia pneumoniae*

**Viruses**

Influenza A  
Influenza B  
Adenovirus  
Seasonal Coronavirus  
Parainfluenza virus  
Respiratory Syncytial virus  
Human Rhinovirus/Enterovirus  
Human Metapneumovirus  
Middle East Respiratory Syndrome Coronavirus (MERS-CoV)

**Antibiotic Resistance Genes**

**ESBL**  
CTX-M

**Carbapenemases**

KPC  
NDM  
Oxa48-like  
VIM  
IMP

**Methicilin Resistance**

mecA/mecC and MREJ

eTable 2. Standard comments for detected bacteria <sup>3-20</sup>

| Respiratory tract microbes divided in different categories according to their potential clinical relevance                                                                                                                                            |                                                                         |
|-------------------------------------------------------------------------------------------------------------------------------------------------------------------------------------------------------------------------------------------------------|-------------------------------------------------------------------------|
| Category                                                                                                                                                                                                                                              | Microbe                                                                 |
| <b>A: Always pathogens</b><br>Always considered relevant in a patient with respiratory tract infection                                                                                                                                                | Adenovirus <sup>6,8,12,14</sup>                                         |
|                                                                                                                                                                                                                                                       | Coronavirus <sup>8,12,14</sup>                                          |
|                                                                                                                                                                                                                                                       | Human metapneumovirus <sup>6, 12,14</sup>                               |
|                                                                                                                                                                                                                                                       | Influenza virus <sup>6,8,12,14</sup>                                    |
|                                                                                                                                                                                                                                                       | MERS <sup>9</sup>                                                       |
|                                                                                                                                                                                                                                                       | Parainfluenza virus <sup>8,12,14</sup>                                  |
|                                                                                                                                                                                                                                                       | Rhinovirus <sup>6,12,14</sup>                                           |
|                                                                                                                                                                                                                                                       | RS-virus <sup>6,8,12,14</sup>                                           |
|                                                                                                                                                                                                                                                       | <i>Bordetella pertussis</i> <sup>4</sup>                                |
|                                                                                                                                                                                                                                                       | <i>Chlamydia pneumoniae</i> <sup>3,6,8,12,14</sup>                      |
|                                                                                                                                                                                                                                                       | <i>Legionella pneumophila</i> <sup>3,6,14</sup>                         |
| <i>Mycoplasma pneumoniae</i> <sup>3,6,8,12,14</sup>                                                                                                                                                                                                   |                                                                         |
| <b>B: Usually pathogens</b><br>Can be colonizers, but are usually considered relevant in a patient with pneumonia                                                                                                                                     | <i>Haemophilus influenzae</i> <sup>3,6,8,12,14</sup>                    |
|                                                                                                                                                                                                                                                       | <i>Streptococcus pneumoniae</i> <sup>3,6,8,12,14,20</sup>               |
|                                                                                                                                                                                                                                                       | <i>Streptococcus pyogenes</i> <sup>11,18,20</sup>                       |
| <b>C: Usually not pathogens</b><br>Usually colonizers, but can cause pneumonia, especially in patients with chronic diseases                                                                                                                          | <i>Klebsiella pneumoniae</i> <sup>7,14,20</sup>                         |
|                                                                                                                                                                                                                                                       | <i>Moraxella catarrhalis</i> <sup>3,5,12,14</sup>                       |
|                                                                                                                                                                                                                                                       | <i>Staphylococcus aureus</i> <sup>3,12,14,15,20</sup>                   |
| <b>D: Usually not pathogens</b><br>A seldom cause of pneumonia in otherwise healthy patients. May be considered relevant if detected as the only bacterial species in a patient with immunosuppression and/or several previous courses of antibiotics | <i>Acinetobacter calcoaceticus-baumannii-complex</i> <sup>4,12,20</sup> |
|                                                                                                                                                                                                                                                       | <i>Enterobacter cloacae</i> <sup>6,12,19</sup>                          |
|                                                                                                                                                                                                                                                       | <i>Escherichia coli</i> <sup>6,12,14,19,20</sup>                        |
|                                                                                                                                                                                                                                                       | <i>Klebsiella aerogenes</i> <sup>6,12</sup>                             |
|                                                                                                                                                                                                                                                       | <i>Klebsiella oxytoca</i> <sup>6,12</sup>                               |
|                                                                                                                                                                                                                                                       | <i>Proteus species</i> <sup>6,12,19</sup>                               |
|                                                                                                                                                                                                                                                       | <i>Pseudomonas aeruginosa</i> <sup>12-14,19,20</sup>                    |
|                                                                                                                                                                                                                                                       | <i>Serratia marcescens</i> <sup>6,12,19</sup>                           |
| <i>Streptococcus agalactiae</i> <sup>17</sup>                                                                                                                                                                                                         |                                                                         |

## References

- 3 Apisarnthanarak, A. & Mundy, L. M. Etiology of community-acquired pneumonia. *Clin Chest Med* **26**, 47-55, doi:10.1016/j.ccm.2004.10.016 (2005).
- 4 Asai, N. *et al.* Clinical manifestations and risk factors of community-onset Acinetobacter species pneumonia in Japan; case control study in a single institute in Japan. *J Infect Chemother* **25**, 639-642, doi:10.1016/j.jiac.2019.03.016 (2019).
- 5 Hirai, J. *et al.* Clinical characteristics of community-acquired pneumonia due to Moraxella catarrhalis in adults: a retrospective single-centre study. *BMC Infect Dis* **20**, 821, doi:10.1186/s12879-020-05564-9 (2020).
- 6 Holter, J. C. *et al.* Etiology of community-acquired pneumonia and diagnostic yields of microbiological methods: a 3-year prospective study in Norway. *BMC Infect Dis* **15**, 64, doi:10.1186/s12879-015-0803-5 (2015).
- 7 Lin, Y. T., Jeng, Y. Y., Chen, T. L. & Fung, C. P. Bacteremic community-acquired pneumonia due to Klebsiella pneumoniae: clinical and microbiological characteristics in Taiwan, 2001-2008. *BMC Infect Dis* **10**, 307, doi:10.1186/1471-2334-10-307 (2010).
- 8 Mandell, L. A. Community-acquired pneumonia: An overview. *Postgrad Med* **127**, 607-615, doi:10.1080/00325481.2015.1074030 (2015).
- 9 Memish, Z. A., Perlman, S., Van Kerkhove, M. D. & Zumla, A. Middle East respiratory syndrome. *Lancet* **395**, 1063-1077, doi:10.1016/S0140-6736(19)33221-0 (2020).
- 10 Metlay, J. P. *et al.* Diagnosis and Treatment of Adults with Community-acquired Pneumonia. An Official Clinical Practice Guideline of the American Thoracic Society and Infectious Diseases Society of America. *American Journal of Respiratory and Critical Care Medicine* **200**, e45-e67, doi:10.1164/rccm.201908-1581ST (2019).
- 11 Muller, M. P. *et al.* Clinical and epidemiologic features of group A streptococcal pneumonia in Ontario, Canada. *Arch Intern Med* **163**, 467-472, doi:10.1001/archinte.163.4.467 (2003).
- 12 Musher, D. M. & Thorner, A. R. Community-Acquired Pneumonia. *New England Journal of Medicine* **371**, 1619-1628, doi:10.1056/NEJMra1312885 (2014).
- 13 Restrepo, M. I. *et al.* Burden and risk factors for Pseudomonas aeruginosa community-acquired pneumonia: a multinational point prevalence study of hospitalised patients. *Eur Respir J* **52**, doi:10.1183/13993003.01190-2017 (2018).
- 14 Rider, A. C. & Frazee, B. W. Community-Acquired Pneumonia. *Emerg Med Clin North Am* **36**, 665-683, doi:10.1016/j.emc.2018.07.001 (2018).
- 15 Self, W. H. *et al.* Staphylococcus aureus Community-acquired Pneumonia: Prevalence, Clinical Characteristics, and Outcomes. *Clin Infect Dis* **63**, 300-309, doi:10.1093/cid/ciw300 (2016).
- 16 Skolnik, K. *et al.* Group B streptococcus (GBS) is an important pathogen in human disease- but what about in cystic fibrosis? *BMC Infect Dis* **17**, 660, doi:10.1186/s12879-017-2729-6 (2017).
- 17 Stralin, K., Olcen, P., Tornqvist, E. & Holmberg, H. Definite, probable, and possible bacterial aetiologies of community-acquired pneumonia at different CRB-65 scores. *Scand J Infect Dis* **42**, 426-434, doi:10.3109/00365540903552353 (2010).
- 18 Tamayo, E., Montes, M., Vicente, D. & Pérez-Trallero, E. Streptococcus pyogenes Pneumonia in Adults: Clinical Presentation and Molecular Characterization of Isolates 2006-2015. *PLoS One* **11**, e0152640, doi:10.1371/journal.pone.0152640 (2016).
- 19 von Baum, H., Welte, T., Marre, R., Suttrop, N. & Ewig, S. Community-acquired pneumonia through Enterobacteriaceae and Pseudomonas aeruginosa: Diagnosis, incidence and predictors. *Eur Respir J* **35**, 598-605, doi:10.1183/09031936.00091809 (2010).
- 20 Wongsurakiat, P. & Chitwarakorn, N. Severe community-acquired pneumonia in general medical wards: outcomes and impact of initial antibiotic selection. *BMC Pulm Med* **19**, 179, doi:10.1186/s12890-019-0944-1 (2019).

### **eTable 3. Definitions and diagnostic clinical criteria for CAP**

(Adapted from Postma D.F. et al.<sup>1</sup> and Serigstad S et al.<sup>2</sup>)

#### **Clinical CAP:**

- Patients with at least two diagnostic criteria\* and in-hospital treatment and/or diagnosis of clinically suspected CAP documented by the treating physician and in agreement with the assessment by a study investigator. In case of disagreement, an additional study investigator will arbitrate.
- Patients with two or more diagnostic criteria and an obvious non-respiratory source of infection are not considered to have a clinical diagnosis of CAP.

#### **Radiologically confirmed CAP:**

- Clinical CAP
- The presence of a new or increased infiltrate on chest radiography or computer tomography (CT).

#### **\* Diagnostic criteria:**

- Cough: recent or worsening
- Production of purulent sputum or a change in the character of sputum
- Temperature  $>38.0^{\circ}\text{C}$  or  $<36.1^{\circ}\text{C}$
- Auscultatory findings consistent with pneumonia, including rales, evidence of pulmonary consolidation (dullness on percussion, bronchial breath sounds, or egophony), or both
- Leukocytosis ( $>11.0 \times 10^9$  white cells per liter or  $> 8.2 \times 10^9$  neutrophils)
- C-reactive protein (CRP) level  $> 50$  mg/L
- Dyspnea, tachypnea, or hypoxemia: recent or worsening

#### **References**

1 Postma, D. F. et al. Antibiotic treatment strategies for community-acquired pneumonia in adults. *N Engl J Med* **372**, 1312-1323, doi:10.1056/NEJMoa1406330 (2015).

2. Rapid syndromic PCR testing in patients with respiratory tract infections reduces time to results and improves microbial yield. Serigstad S, Markussen D, Grewal HMS, Ebbesen M, Kommedal Ø, Heggelund L, van Werkhoven CH, Faurholt-Jepsen D, Clark TW, Ritz C, Ulvestad E, Bjørneklett R, Knoop ST; CAPNOR Study Group. *Sci Rep.* 2022 Jan 10;12(1):326. doi: 10.1038/s41598-021-03741-7.

**eTable 4.** Baseline characteristics for CAP patients only (n=200)

|                                              | <b>FAP plus</b><br>(n=97) | <b>Standard-of-care</b><br>(n=103) |
|----------------------------------------------|---------------------------|------------------------------------|
| <i>Age (years)</i>                           | 71 (60, 82)               | 72 (62, 80)                        |
| <i>Sex (% Female)</i>                        | 40 (39/97)                | 42 (43/103)                        |
| <i>Current smoker</i>                        | 21 (20/97)                | 13 (14/103)                        |
| <i>Influenza vaccine</i>                     | 53 (52/97)                | 58 (60/103)                        |
| <i>Pneumococcal vaccine</i>                  | 38 (37/97)                | 37 (38/103)                        |
| <i>Duration of symptoms (days)</i>           | 6.5 (3.6, 8.7)            | 5.8 (3.5, 7.6)                     |
| <i>Antibiotics with 48 hours</i>             | 23 (22/97)                | 17 (18/103)                        |
| <i>Antibiotics within the last month (%)</i> | 15 (15/97)                | 9 (9/103)                          |
| <b>Comorbidities</b>                         |                           |                                    |
| <i>Hypertension</i>                          | 37 (36/97)                | 39 (40/103)                        |
| <i>Cardiovascular disease</i>                | 34 (33/97)                | 30 (31/103)                        |
| <i>Respiratory disease</i>                   | 54 (52/97)                | 50 (51/103)                        |
| <i>Renal disease</i>                         | 11 (11/97)                | 9 (9/103)                          |
| <i>Liver disease</i>                         | 0 (0/97)                  | 2 (2/103)                          |
| <i>Diabetes</i>                              | 8 (8/97)                  | 14 (14/103)                        |
| <i>Immunocompromised</i>                     | 8 (8/97)                  | 12 (12/103)                        |
| <i>Cancer</i>                                | 9 (9/97)                  | 7 (7/103)                          |
| <i>Charlson Comorbidity Index score</i>      | 4 (2, 5)                  | 4 (2, 5)                           |
| <b>Observations</b>                          |                           |                                    |
| <i>Temperature (°C)</i>                      | 37.2 (36.8, 37.6)         | 37.2 (36.8, 37.7)                  |
| <i>Pulse rate (bpm)</i>                      | 92 (78, 109)              | 94 (85, 110)                       |

|                                                                    |                  |                  |
|--------------------------------------------------------------------|------------------|------------------|
| <i>Respiratory rate (bpm)</i>                                      | 22 (20, 25)      | 24 (20, 28)      |
| <i>O<sub>2</sub> saturations (%)</i>                               | 93 (90, 96)      | 93 (89, 96)      |
| <i>Supplementary O<sub>2</sub></i>                                 | 6 (6/97)         | 6 (6/103)        |
| <b><i>Blood pressure (mmHg)</i></b>                                |                  |                  |
| <i>Systolic</i>                                                    | 127 (116, 146)   | 134 (117, 148)   |
| <i>Diastolic</i>                                                   | 80 (71, 86)      | 80 (70, 88)      |
| <b><i>Laboratory and radiology</i></b>                             |                  |                  |
| <i>CRP (mg/L)</i>                                                  | 135 (83, 209)    | 151 (101, 237)   |
| <i>White blood cell count<br/>(<math>\times 10^9</math> per L)</i> | 11.3 (8.1, 16.7) | 11.9 (8.7, 15.0) |
| <i>Chest X-ray (%)</i>                                             | 96 (93/97)       | 97 (100/103)     |
| <i>Chest CT (%)</i>                                                | 24 (23/97)       | 20 (21/103)      |
| <i>CRB-65</i>                                                      | 1 (1, 2)         | 1 (1, 2)         |
| <i>qSOFA</i>                                                       | 1 (0, 1)         | 1 (0, 1)         |
| <i>SARS-CoV-2 positive test</i>                                    | 15 (15/97)       | 16 (16/103)      |

Data are shown as percentage (count) and median (IQR) for binary and continuous variables, respectively.

IQR = interquartile range. O<sub>2</sub>=oxygen. CRP = C-reactive protein. CT = computed tomography. CRP and white blood cell counts presented are the highest values during hospitalization. *CRB-65*= confusion, respiratory rate, blood pressure, and age > 65 years; *qSOFA*= quick sequential organ failure assessment score.

**eTable 5. Pathogen-directed treatment within 48 hours for patients with pneumonia (n=200)**

| Pathogen-directed treatment                                                                        | Test that initiated pathogen-directed treatment | Standard of care N=16 |                                                               | FAP <i>plus</i> N=46 |                                                                                                                          |
|----------------------------------------------------------------------------------------------------|-------------------------------------------------|-----------------------|---------------------------------------------------------------|----------------------|--------------------------------------------------------------------------------------------------------------------------|
|                                                                                                    |                                                 | N                     | Pathogen-directed antibacterial therapy                       | N                    | Pathogen-directed antibacterial therapy                                                                                  |
| Continuation of appropriate empirical treatment                                                    | Blood cultures                                  | 0                     |                                                               | 2                    | PenG: 2                                                                                                                  |
|                                                                                                    | LRT culture                                     | 1                     | PenG: 1                                                       | 0                    |                                                                                                                          |
|                                                                                                    | FAP <i>plus</i>                                 | 0                     |                                                               | 13                   | PenG: 11<br>Carbapenems: 1<br>Pip/Tazo: 1                                                                                |
|                                                                                                    | PUAT                                            | 6                     | PenG: 5<br>Ampicillin: 1                                      | 1                    | PenG: 1                                                                                                                  |
|                                                                                                    | Total                                           | 7                     |                                                               | 16                   |                                                                                                                          |
|                                                                                                    |                                                 |                       |                                                               |                      |                                                                                                                          |
| Escalation to more broad-spectrum treatment                                                        | Blood cultures                                  | 3                     | PenG to 3GC: 2<br>PenG to a more broad-spectrum penicillin: 1 | 0                    |                                                                                                                          |
|                                                                                                    | LRT culture                                     | 1                     | PenG to a more broad-spectrum penicillin: 1                   | 0                    |                                                                                                                          |
|                                                                                                    | FAP <i>plus</i>                                 | 0                     |                                                               | 14                   | PenG changed to a more broad-spectrum penicillin: 6<br>Benzylpenicillin to 3GC: 5<br>Aminoglycoside added: 2<br>Other: 1 |
|                                                                                                    | Total                                           | 4                     |                                                               | 14                   |                                                                                                                          |
|                                                                                                    |                                                 |                       |                                                               |                      |                                                                                                                          |
| De-escalation to more narrow-spectrum treatment                                                    | Other                                           | 1*                    | 3GC to quinolone                                              | 0                    |                                                                                                                          |
|                                                                                                    | LRT culture                                     | 2                     |                                                               | 0                    |                                                                                                                          |
|                                                                                                    | FAP <i>plus</i>                                 | 0                     |                                                               | 10                   | Stopped aminoglycosides: 5<br>Stopped macrolides: 3<br>Stopped clindamycin: 1<br>3GC to ciprofloxacin: 1                 |
|                                                                                                    | PUAT                                            | 4                     | Stopped aminoglycosides: 3<br>3GC to PenG: 1                  | 0                    |                                                                                                                          |
|                                                                                                    | Total                                           | 5                     |                                                               | 10                   |                                                                                                                          |
|                                                                                                    |                                                 |                       |                                                               |                      |                                                                                                                          |
| Initiated pathogen-directed antimicrobial treatment (without prior empirical antibiotic treatment) | FAP <i>plus</i>                                 | 0                     |                                                               | 6                    | PenG: 2<br>Ampicillin: 1<br>Amoxi/Clav:1<br>3GC: 2                                                                       |
|                                                                                                    | Total                                           | 0                     |                                                               | 6                    |                                                                                                                          |

Abbreviations: FAP *plus* - Biofire® Filmarray® Pneumonia plus Panel; LRT culture – lower respiratory tract sample culture; PUAT – pneumococcal urine antigen test; PenG – Benzylpenicillin; 3GC - third generation cephalosporins; Pip/Tazo - Piperacillin/Tazobactam; TMP/S - Trimethoprim/sulfamethoxazole; Amoxi/Clav - Amoxicillin/Clavulanic acid

\*) *Legionella pneumophila* PCR



**eTable 6.** Comparison of length of stay and clinical outcomes between rapid testing by FAP *plus* and standard-of-care for all randomised patients (n=374) and CAP patients only (n=200), respectively

|                              | FAP <i>plus</i> | Standard-of-care | FAP <i>plus</i> vs. Standard-of-care <sup>#</sup> |                         |         |
|------------------------------|-----------------|------------------|---------------------------------------------------|-------------------------|---------|
|                              |                 |                  | Difference                                        | Odds ratio              | p-value |
| <i>All patients (n=374)</i>  |                 |                  |                                                   |                         |         |
| <i>Readmission</i>           | 15.5 (29/187)   | 18.7 (35/187)    | -3.2 (-10.8, 4.4)                                 | 0.80 (0.46, 1.37)       | 0.41    |
| <i>30-day mortality</i>      | 4.8 (9/187)     | 3.7 (7/187)      | 1.1 (-3.0, 5.2)                                   | 1.30 (0.47, 3.71)       | 0.61    |
| <i>90-day mortality</i>      | 8.6 (16/187)    | 5.9 (11/187)     | 2.7 (-2.6, 7.9)                                   | 1.50 (0.68, 3.41)       | 0.32    |
|                              |                 |                  |                                                   | <b>Ratio of medians</b> |         |
| <i>Length of stay (days)</i> | 3.3 (2.0, 6.0)  | 3.2 (2.0, 6.0)   | 0.15 (-0.55, 0.85)                                | 1.05 (0.83, 1.34)       | 0.67    |
|                              |                 |                  |                                                   |                         |         |
| <i>CAP patients (n=200)</i>  |                 |                  |                                                   | <b>Odds ratio</b>       |         |
| <i>Readmission</i>           | 14.4 (14/97)    | 18.4 (19/103)    | -4.0 (-14.3, 6.2)                                 | 0.75 (0.35, 1.58)       | 0.45    |
| <i>30-day mortality</i>      | 3.1 (3/97)      | 3.9 (4/103)      | -0.8 (-5.9, 4.3)                                  | 0.79 (0.15, 3.67)       | 0.76    |
| <i>90-day mortality</i>      | 7.2 (7/97)      | 5.8 (6/103)      | 1.4 (-5.5, 8.2)                                   | 1.26 (0.40, 4.04)       | 0.69    |
|                              |                 |                  |                                                   | <b>Ratio of medians</b> |         |
| <i>Length of stay (days)</i> | 3.9 (2.9, 6.1)  | 4.0 (2.2, 6.3)   | 0.48 (-0.48, 1.45)                                | 1.15 (0.87, 1.51)       | 0.33    |

Data shown as percentage (count) for binary outcomes and as median (IQR) for length of stay.

<sup>#</sup>: Differences were estimated as risk differences for binary outcomes (on readmission and mortality) and differences of median for length of stay using unadjusted logistic regression and linear regression with logarithm-transformed length of stay, respectively. Odds ratios for binary outcomes and ratio of medians for length of stay were estimated using unadjusted logistic and linear regression with logarithm-transformed length of stay, respectively. p-values corresponding to testing ratios equal to 1 were reported.

FAP *plus*, BioFire FilmArray Pneumonia panel *plus* (bioMérieux S.A., Marcy-l’Etoile, France); CAP, community-acquired pneumonia; IQR, interquartile range.

**eTable 7. Microbiological detections in respiratory samples in the standard-of-care and FAP *plus* arms**

| Microbe detected                                                     | All randomized patients  |                  | Patients with pneumonia and provided an LRT sample |                 |
|----------------------------------------------------------------------|--------------------------|------------------|----------------------------------------------------|-----------------|
|                                                                      | Standard of care (n=187) | FAP plus (n=187) | Standard of care (n=103)                           | FAP plus (n=97) |
| <i>Acinetobacter calcoaceticus-baumannii</i> complex                 | 0                        | 4                | 0                                                  | 1               |
| <i>Enterobacter cloacae</i> complex                                  | 0                        | 4                | 0                                                  | 4               |
| <i>Escherichia coli</i>                                              | 5                        | 13               | 3                                                  | 5               |
| <i>Haemophilus influenzae</i>                                        | 22                       | 40               | 18                                                 | 29              |
| <i>Klebsiella aerogenes</i>                                          | 0                        | 0                | 0                                                  | 0               |
| <i>Klebsiella oxytoca</i>                                            | 1                        | 6                | 1                                                  | 3               |
| <i>Klebsiella pneumoniae</i> group                                   | 2                        | 5                | 1                                                  | 3               |
| <i>Moraxella catarrhalis</i>                                         | 11                       | 16               | 9                                                  | 11              |
| <i>Proteus</i> spp.                                                  | 0                        | 3                | 0                                                  | 1               |
| <i>Pseudomonas aeruginosa</i>                                        | 5                        | 10               | 4                                                  | 4               |
| <i>Serratia marcescens</i>                                           | 2                        | 2                | 0                                                  | 1               |
| <i>Staphylococcus aureus</i>                                         | 7                        | 36               | 4                                                  | 23              |
| <i>Streptococcus agalactiae</i>                                      | 0                        | 9                | 0                                                  | 6               |
| <i>Streptococcus pneumoniae</i>                                      | 14                       | 26               | 14                                                 | 21              |
| <i>Streptococcus pyogenes</i>                                        | 0                        | 1                | 0                                                  | 1               |
| <i>Legionella pneumophila</i>                                        | 1                        | 0                | 1                                                  | 0               |
| <i>Mycoplasma pneumoniae</i>                                         | 0                        | 0                | 0                                                  | 0               |
| <i>Chlamydia pneumoniae</i>                                          | 0                        | 0                | 0                                                  | 0               |
| Other bacterial pathogens not included in the FAP <i>plus</i> panel* | 3                        | 0                | 2                                                  | 0               |
| <b>Total number of bacterial detections</b>                          | <b>72</b>                | <b>175</b>       | <b>57</b>                                          | <b>113</b>      |
| SARS-CoV-2**                                                         | 24                       | 28               | 16                                                 | 15              |
| Human rhinovirus/enterovirus                                         | 14                       | 22               | 5                                                  | 12              |
| Parainfluenza virus                                                  | 7                        | 4                | 2                                                  | 0               |
| Respiratory syncytial virus                                          | 10                       | 15               | 4                                                  | 7               |
| Seasonal coronavirus***                                              | 0                        | 7                | 0                                                  | 5               |
| Human metapneumovirus                                                | 7                        | 0                | 5                                                  | 0               |
| Adenovirus                                                           | 0                        | 1                | 0                                                  | 0               |
| Influenza A virus                                                    | 1                        | 0                | 1                                                  | 0               |
| Influenza B virus                                                    | 1                        | 0                | 1                                                  | 0               |
| <b>Total number of viral detections</b>                              | <b>63</b>                | <b>74</b>        | <b>34</b>                                          | <b>39</b>       |

Abbreviations: FAP *plus*, Biofire FilmArray Pneumonia panel *plus*; SARS-CoV-2, severe acute respiratory syndrome coronavirus 2.

\*) One detection of *S. dysgalactiae* and two detections of *K. variicola*

\*\*\*) SARS-CoV-2 is not a target in the FAP *plus* and was tested using laboratory PCR.

\*\*\*) Seasonal human coronavirus includes: HKU1, 229E, NL63 and OC43. Testing for seasonal coronavirus was not part of the standard of care diagnostics until May 2022.
