# Supplementary material for: Diagnostic Stewardship in Community-Acquired Pneumonia With Syndromic Molecular Testing: A Randomized Clinical Trial
Source: PubMed Central journal article supplement (PMC10918504; doi:10.1001/jamanetworkopen.2024.0830), 2024-03-06
Supplement: jamanetwopen-e240830-s003.pdf [file jamanetwopen-e240830-s003.pdf]

## Data Sharing Statement

Markussen. Diagnostic Stewardship in Community-Acquired Pneumonia With Syndromic Molecular Testing. *JAMA Netw Open*. Published March 06, 2024.  
doi:10.1001/jamanetworkopen.2024.0830

### Data

**Data available:** Yes

**Data types:** Deidentified participant data, Data dictionary

**How to access data:** All de-identified participant data analysed and presented in this study are available from the corresponding author following publication upon reasonable request.

**When available:** With publication

### Supporting Documents

**Document types:** Other (please specify)

**Additional Information:** All de-identified participant data analysed and presented in this study are available from the corresponding author following publication upon reasonable request.

**How to access documents:** All de-identified participant data analysed and presented in this study are available from the corresponding author following publication upon reasonable request.

**When available:** With publication

### Additional Information

**Who can access the data:** Data sharing will be permitted with researchers whose proposed use of the data has been approved.

**Types of analyses:** Data sharing requests within three years of publication should be made to the first author at [Harleen.Grewal@UiB.no](mailto:Harleen.Grewal@UiB.no) for the provision of the data dictionary and data request form.

**Mechanisms of data availability:** with a signed data access agreement
